# Supplementary material for: Insight into the cryptic diversity and phylogeography of the peculiar fried egg jellyfish Phacellophora (Cnidaria, Scyphozoa, Ulmaridae)
Source: PeerJ journal article supplement (doi:10.7717/peerj.13125), 2022-03-31
Supplement: TableS2.pdf [file TableS2.pdf]

| Accession number | Localisation                                     | Longitude         | Latitude         | Haplotype |
|------------------|--------------------------------------------------|-------------------|------------------|-----------|
| GQ120099         | Gulf of Maine, New England, USA                  | -67.49            | 42.29            | H5        |
| GQ120098         | Gulf of Maine, New England, USA                  | -67.49            | 42.29            | H6        |
| GQ120097         | Gulf of Maine, New England, USA                  | -67.49            | 42.29            | H8        |
| MF742371         | Lincoln City, Oregon, USA                        | -124.55           | 45               | H9        |
| MF742370         | Lincoln City, Oregon, USA                        | -124.55           | 45               | H11       |
| MF742369         | Lincoln City, Oregon, USA                        | -124.55           | 45               | H12       |
| MF742368         | Lincoln City, Oregon, USA                        | -124.55           | 45               | H12       |
| MF742367         | Lincoln City, Oregon, USA                        | -124.55           | 45               | H10       |
| MF742366         | Lincoln City, Oregon, USA                        | -124.55           | 45               | H10       |
| MF742365         | Pillar Point, San Mateo County, California, USA  | -122.75           | 37.5             | H1        |
| MF742364         | Pillar Point, San Mateo County, California, USA  | -122.75           | 37.5             | H1        |
| MF742363         | Pillar Point, San Mateo County, California, USA  | -122.75           | 37.5             | H1        |
| MF742362         | Pillar Point, San Mateo County, California, USA  | -122.75           | 37.5             | H1        |
| MF742361         | Pillar Point, San Mateo County, California, USA  | -122.75           | 37.5             | H1        |
| MF742360         | Pillar Point, San Mateo County, California, USA  | -122.75           | 37.5             | H1        |
| MF742359         | Bell Harbor Marina, Puget Sound, Washington, USA | -122.34           | 47.61            | H2        |
| MF742358         | Bell Harbor Marina, Puget Sound, Washington, USA | -122.34           | 47.61            | H1        |
| MF742357         | Bell Harbor Marina, Puget Sound, Washington, USA | -122.34           | 47.61            | H2        |
| MF742356         | Bell Harbor Marina, Puget Sound, Washington, USA | -122.34           | 47.61            | H1        |
| MF742355         | Bell Harbor Marina, Puget Sound, Washington, USA | -122.34           | 47.61            | H3        |
| MF742354         | Bell Harbor Marina, Puget Sound, Washington, USA | -122.34           | 47.61            | H1        |
| MF742353         | San Quint'n, Baja California Sur, Mexico         | -115.97           | 30.34            | H4        |
| MF742352         | San Quint'n, Baja California Sur, Mexico         | -115.97           | 30.34            | H1        |
| MF742351         | San Quint'n, Baja California Sur, Mexico         | -115.97           | 30.34            | H1        |
| MF742350         | San Quint'n, Baja California Sur, Mexico         | -115.97           | 30.34            | H1        |
| MF742349         | San Quint'n, Baja California Sur, Mexico         | -115.97           | 30.34            | H1        |
| MF742348         | San Quint'n, Baja California Sur, Mexico         | -115.97           | 30.34            | H1        |
| *KBCSM011-14     | Vancouver Island, Canada                         | -123.54           | 48.54            | H1        |
| *KBCSM013-14     | Vancouver Island, Canada                         | -123.54           | 48.54            | H3        |
| *KBCSM229-14     | Hecate Strait, British Columbia                  | -129.8            | 52.72            | H12       |
| *KBCSM237-14     | Hecate Strait, British Columbia                  | -130.05           | 52.7             | H9        |
| *KBCSM258-14     | Hecate Strait, British Columbia                  | -130.78           | 52.82            | H1        |
| *KBCSM701-14     | Vancouver Island, Canada                         | -123.54           | 48.54            | H1        |
| *KBCSM472-14     | Hecate Strait, British Columbia                  | -131.142          | 53.96            | H1        |
| *KBCSM473-14     | Hecate Strait, British Columbia                  | -131.142          | 53.96            | H1        |
| PCA1             | Sao Miguel Island, Azores                        | -25.4730853       | 37.8085274       | H8        |
| PCA3             | Sao Miguel Island, Azores                        | -25.4730853       | 37.8085274       | H8        |
| PCA7             | Terceira island, Azores                          | -27.2177696228027 | 38.7212104797363 | H7        |
| *KHBC182-13      | Vancouver Aquarium, Canada                       |                   |                  | H1        |
