# Supplementary material for: Insight into the cryptic diversity and phylogeography of the peculiar fried egg jellyfish Phacellophora (Cnidaria, Scyphozoa, Ulmaridae)
Source: PeerJ journal article supplement (doi:10.7717/peerj.13125), 2022-03-31
Supplement: TableS3.pdf [file TableS3.pdf]

| Haplotype | Frequency (in %) |
|-----------|------------------|
| H1        | 51.28            |
| H2        | 5.13             |
| H3        | 5.13             |
| H4        | 2.56             |
| H5        | 2.56             |
| H6        | 2.56             |
| H7        | 2.56             |
| H8        | 7.7              |
| H9        | 5.13             |
| H10       | 5.13             |
| H11       | 2.56             |
| H12       | 7.7              |
| Total     | 100              |
